# Supplementary material
Source: PubMed Central journal article supplement (PMC6838826)
Supplement: DS1_JVDI_10.1177_1040638719833436.pdf [file DS1_JVDI_10.1177_1040638719833436.pdf]

**Supplementary Table 1.** Description and prevalence of major histologic lesions in a sample of wild urban Norway rats (*Rattus norvegicus*) trapped in Vancouver, British Columbia, Canada.

| Category                                   | Histologic description                                                                                          | n/N*    | Prevalence | 95% CI    |
|--------------------------------------------|-----------------------------------------------------------------------------------------------------------------|---------|------------|-----------|
| Cardiovascular                             |                                                                                                                 |         |            |           |
| Cardiomyopathy                             | Lymphoplasmacytic myocarditis, fibrosis, and/or myocardial degeneration                                         | 128/406 | 32         | 27.0–36.0 |
| Myocardial mineralization                  | Granular basophilic material within interstitium and myocytes                                                   | 35/406  | 8.6        | 6.1–11.7  |
| Mineralization of pulmonary blood vessels  | Granular basophilic material within the tunica intima                                                           | 62/404  | 15         | 12.0–19.2 |
| Medial hypertrophy of pulmonary arterioles | Tunica media smooth muscle thickening†                                                                          | 90/404  | 22         | 18.3–26.7 |
| Right ventricular hypertrophy              | Right and left ventricle free walls are of equal width                                                          | 18/403  | 4.5        | 2.7–7.0   |
| Digestive                                  |                                                                                                                 |         |            |           |
| Non-glandular stomach lesions‡             | Hyperkeratosis,§ mucosal hyperplasia,   keratin pustules, and/or submucosal inflammation#                       | 231/388 | 60         | 54.4–64.5 |
| Endocrine                                  |                                                                                                                 |         |            |           |
| Adrenal gland mineralization               | Granular basophilic material within adrenal cortex or medulla                                                   | 5/365   | 1.4        | 0.4–3.2   |
| Thyroid gland mineralization               | Granular basophilic material within interstitium and follicles                                                  | 132/280 | 47         | 41.1–53.2 |
| Thyroid gland follicular hyperplasia       | Hypertrophic follicular epithelial cells surround small or absent follicular lumens that are devoid of colloid¶ | 142/279 | 51         | 44.9–56.9 |
| Integumentary                              |                                                                                                                 |         |            |           |
| Dermatitis                                 | Inflammation in the dermis, panniculus, and/or hair follicles not associated with a skin wound                  | 26/355  | 7.3        | 4.8–10.5  |
| Lymphatic                                  |                                                                                                                 |         |            |           |

Pathology of wild Norway rats

|                                       |                                                                                                                         |         |     |           |
|---------------------------------------|-------------------------------------------------------------------------------------------------------------------------|---------|-----|-----------|
| Lymphadenitis                         | Severe accumulations of granulocytes and/or abscess(s)                                                                  | 11/342  | 3.2 | 1.6–5.7   |
| Respiratory                           |                                                                                                                         |         |     |           |
| Cilia-associated respiratory bacillus | Mats of filamentous bacteria on ciliated epithelium of the trachea or nasal cavity                                      | 66/270  | 24  | 19.4–30.0 |
| Epiglossitis/laryngitis               | Lymphoplasmacytic and/or granulocytic submucosal inflammation                                                           | 79/202  | 39  | 32.3–46.2 |
| Inducible BALT**                      | Peribronchiolar and/or perivascular lymphoplasmacytic cuffs††                                                           | 270/403 | 67  | 62.2–71.6 |
| Perivascular mixed inflammation       | Perivascular cuffs of lymphocytes, plasma cells, and granulocytes surrounding $\geq 3$ blood vessels                    | 80/404  | 20  | 16.0–24.0 |
| Rhinitis                              | Lymphoplasmacytic and/or granulocytic inflammation in the nasal submucosa with suppurative debris in nasal cavity lumen | 10/25   | 40  | 21.1–61.3 |
| Tracheitis                            | Lymphoplasmacytic and/or granulocytic submucosal and/or periglandular inflammation                                      | 192/372 | 52  | 46.6–56.8 |
| Tracheal gland ectasia                | Dilation of $\geq 3$ tracheal submucosal glands                                                                         | 68/364  | 19  | 14.8–23.1 |
| Tracheal gland adenitis               | Granulocytes and/or necrotic debris within $\geq 3$ submucosal glands                                                   | 25/364  | 6.9 | 4.5–10.0  |
| Urinary                               |                                                                                                                         |         |     |           |
| Crystals                              | Birefringent crystals within $\geq 3$ renal tubules                                                                     | 137/405 | 34  | 29.2–38.7 |
| Interstitial nephritis                | Interstitial lymphoplasmacytic inflammation‡‡                                                                           | 121/405 | 30  | 25.5–34.6 |
| Mineralization                        | Granular basophilic material within renal tubules/interstitium                                                          | 85/405  | 21  | 17.1–25.3 |
| Pyelitis                              | Lymphoplasmacytic inflammation in interstitium immediately adjacent to the renal pelvis                                 | 85/255  | 33  | 27.6–39.5 |

CI = confidence interval.

\* The number of rats examined for each lesion varies because not all tissues were available for each individual rat because of sampling error, tissue artifacts, and/or autolysis.

† Percent medial thickness ( $2 \text{ [medial thickness]} \times 100/\text{external vessel diameter}$ ) =  $\geq 50\%$  of the vessel diameter.

‡ Lesions were associated with *Eucoleus* sp. infection.<sup>85</sup>

§ Keratin layer >45 µm thick in areas without artificial separation and not adjacent to the limiting ridge (junction with glandular stomach).

| Mucosa is >4–6 cells thick, affecting mainly the basal layers and >25% of the section.

# Granulocytes infiltrating >2 foci not adjacent to the limiting ridge.

¶ Follicular cells were tall cuboidal to columnar and had to affect >50% of the thyroid gland and with ≤10 normal follicles.

\*\* Inducible bronchus-associated lymphoid tissue, which is associated with *Mycoplasma pulmonis* and cilia-associated respiratory bacillus in subsample of rats in the current study.<sup>84</sup>

†† Surrounds ≥3 secondary or tertiary bronchioles or 1 primary bronchiole and/or ≥3 blood vessels.

‡‡ Present in ≥2 locations within the renal interstitium and excluding areas immediately adjacent to the renal pelvis.

**Supplementary Table 2.** Neoplastic and proliferative lesions in a sample of wild urban Norway rats trapped in Vancouver, British Columbia, Canada.

| Lesion             | Gross description                                        | Histologic description                                                                                                    | No. affected* | Reference |
|--------------------|----------------------------------------------------------|---------------------------------------------------------------------------------------------------------------------------|---------------|-----------|
| Squamous papilloma | Proliferative mass on the dorsum of the tongue           | A focal, discrete area of hyperkeratosis, moderate mucosal hyperplasia with rete pegs                                     | 1             | NA        |
| Squamous papilloma | Pedunculated mass arising from the non-glandular stomach | Severe hyperkeratosis, mucosal hyperplasia, and submucosal edema with intramucosal <i>Eucoleus</i> sp. nematodes and eggs | 1             | 85        |

Pathology of wild Norway rats

|                               |                                                                                                                                                                                          |                                                                                                                                                                                                                                                                                                                                                                                                                     |    |                      |
|-------------------------------|------------------------------------------------------------------------------------------------------------------------------------------------------------------------------------------|---------------------------------------------------------------------------------------------------------------------------------------------------------------------------------------------------------------------------------------------------------------------------------------------------------------------------------------------------------------------------------------------------------------------|----|----------------------|
| Cortical hyperplastic nodules | NA                                                                                                                                                                                       | Focal, discrete, expansile, encapsulated nodules comprised of cords and bundles of polygonal epithelial cells consistent with adrenal cortical cells within the adrenal gland capsule.                                                                                                                                                                                                                              | 4† | NA                   |
| Cutaneous pox lesions         | Proliferative mass spanning the nail bed to the distal interphalangeal joint on the second digit (in one rat); proliferative plaque on the left front first metacarpal (in a second rat) | A focal, discrete area of epithelial proliferation characterized by severe acanthosis, dyskeratotic hyperkeratosis, and scalloping of the epidermal–dermal junction. Keratinocytes in the stratum spinosum contained large, amorphous amphophilic intracytoplasmic inclusions that contained multiple pox-like virions (enveloped ovoid to brick-shaped viral particles, ~200 × 300 nm‡; Supplementary Figs. 7–10). | 2  | NA                   |
| Hibernoma                     | NA                                                                                                                                                                                       | A focal, expansile, pseudoencapsulated mass in the perirenal fat. Cells were round-to-polygonal and contained single or multiple variably sized lipid vacuoles.                                                                                                                                                                                                                                                     | 1† | NA                   |
| Mucous cell metaplasia        | Focal, circular nodule with depressed center on the surface of the right cranial lung lobe                                                                                               | Focal dilated, respiratory epithelium-lined alveoli containing mucin, inflammatory cell debris, mononuclear cells, and giant cells.                                                                                                                                                                                                                                                                                 | 1  | 84 (Suppl. material) |
| Round cell tumor              | Multiple neoplastic nodules arise from the cranial and middle lung lobes                                                                                                                 | Locally extensive effacement of lung parenchyma by sheets of neoplastic round cells (possibly histiocytes) with moderate anisokaryosis and copious, foamy cytoplasm and lymphocytes. Similar neoplastic cells were within multiple lymph nodes.                                                                                                                                                                     | 1  | 84 (Suppl. material) |

NA = not applicable.

\* 672 individuals for grossly evident lesions; lesions detected by histologic examination were assessed in up to 406 individuals and are indicated by superscript †.

† Up to 406 individuals were examined for microscopic lesions. The exact number of tissues examined for these lesions was not systematically recorded given the rarity of these lesions.

‡ Visualized with transmission electron microscopy.

**Supplementary Table 3.** Rare non-proliferative lesions in a sample of wild urban Norway rats trapped in Vancouver, British Columbia, Canada.

| System        | Lesion                                 | Description                                                                                                                                                                                                                                         | No. affected* |
|---------------|----------------------------------------|-----------------------------------------------------------------------------------------------------------------------------------------------------------------------------------------------------------------------------------------------------|---------------|
| Digestive     | Double esophagus                       | Two distinct esophageal lumens in the proximal esophagus at the level of the thyroid glands (Fig. 5).                                                                                                                                               | 1             |
|               | Fungal gastritis                       | Yeast and fungal hyphae in the superficial keratin layer of the non-glandular stomach with associated granulocytic inflammation in the keratin layer, mucosa, and submucosa. There was focal ulceration in one of these.                            | 3             |
|               | Gastric ulceration                     | Focal ulceration of the glandular stomach.                                                                                                                                                                                                          | 1             |
|               | Meckel diverticulum                    | A 5-mm saccular appendage arising from the anti-mesenteric side of the jejunum.                                                                                                                                                                     | 1†            |
|               | Sialadenitis                           | Salivary glands were swollen and red with associated microscopic focal necrosis, granulocytic, and/or mononuclear inflammation, and/or fibrosis, and atrophy. In one affected rat, there were microscopic abscesses within the adjacent lymph node. | 5†            |
| Endocrine     | Adrenatitis                            | Lymphoplasmacytic inflammation of the adrenal cortex and medulla; severe architectural effacement with necrosis and mineralization in one rat.                                                                                                      | 3             |
|               | Adrenal gland mineralization           | Finely granular basophilic material the adrenal cortex and medulla.                                                                                                                                                                                 | 4             |
|               | Thyroiditis                            | Bilateral, multifocal lymphoplasmacytic cellular infiltrate affecting ~50% of the thyroid gland.                                                                                                                                                    | 1             |
| Hemolymphatic | Lymph node abscess                     | Purulent material effacing lymph node architecture and surrounded by a fibrous capsule (mesenteric and retropharyngeal).                                                                                                                            | 8†            |
|               | Splenic fibrosis                       | A band of fibrous connective tissue focally constricted the spleen.                                                                                                                                                                                 | 2†            |
| Hepatic       | Lipidosis                              | Diffusely, hepatocytes of a gravid female in good nutritional condition contained single clear vacuoles (consistent with fat).                                                                                                                      | 1             |
|               | Lymphoplasmacytic periportal hepatitis | Infiltrate of lymphocytes and plasma cells within portal regions (etiology unknown).                                                                                                                                                                | 1             |
|               | Multifocal hepatic necrosis            | Multifocal, random areas of hepatic necrosis throughout the parenchyma (etiology unknown).                                                                                                                                                          |               |

Pathology of wild Norway rats

|                                                 |                                        |                                                                                                                                                                                                                                                                                                                                                                                                                                                                                                                                                                                                                                                                                                                                                                                              |     |
|-------------------------------------------------|----------------------------------------|----------------------------------------------------------------------------------------------------------------------------------------------------------------------------------------------------------------------------------------------------------------------------------------------------------------------------------------------------------------------------------------------------------------------------------------------------------------------------------------------------------------------------------------------------------------------------------------------------------------------------------------------------------------------------------------------------------------------------------------------------------------------------------------------|-----|
| Integument                                      | Chemical dermatosis and thermal injury | Pinnae were shrunken, deformed, hyperemic, and ulcerated along the edges of turquoise material (suspected paint) and had linear excoriations (suspected from scratching trauma). Whiskers of this rat were singed (suspected as malicious burning while rat was in the trap). Histologically, pinnae were affected by orthokeratotic hyperkeratosis, epidermal hyperplasia, congestion, granulocytes, lymphocytes, and plasma cells, and serum lakes in the dermis (suspect chronic response to paint). In multifocal areas of the pinna, the epidermis was ulcerated, and dermal collagen was pale and lacked distinct fibers. Hair follicles, adnexal structures, and blood vessels were necrotic, with colonies of coccoid bacteria throughout the dermis (suspect acute thermal injury). | 1 † |
|                                                 | Pinnal fungal dermatitis               | Multifocal white crusts on the margin of the right pinna with histologic mild parakeratotic hyperkeratosis, intrakeratin pustules, moderate epidermal hyperplasia, subcutaneous lymphoplasmacytic inflammation, and septate fungal hyphae within hair follicles.                                                                                                                                                                                                                                                                                                                                                                                                                                                                                                                             | 1 † |
|                                                 | Pinnal hyperkeratosis                  | Grossly evident severe bilateral pinnal hyperkeratosis (Supplementary Fig. 21).                                                                                                                                                                                                                                                                                                                                                                                                                                                                                                                                                                                                                                                                                                              | 1 † |
| Ocular                                          | Bilateral panophthalmitis              | Crusting mucopurulent discharge rimmed eyes, and corneas were opaque (Supplementary Fig. 22). Histologically, corneal melting and perforations were covered in necrotic cell debris, bacterial colonies, fibrin, and granulocytes that also extended into the anterior and posterior chambers. Free hair shafts were present deep within both globes (suggestive of trauma). The iris was prolapsed, and remnant lens capsules were coiled with no other visible lens structures. Optic nerves contained granulocytes, lymphocytes, and plasma cells. Bacterial culture results: <i>Pasteurella dagmatis</i> and <i>Streptococcus gallinaceus</i> . This rat also had multiple wounds to the left forelimb, possibly related to its lack of vision.                                          | 1 † |
| Musculoskeletal, adipose, and connective tissue | Coxofemoral arthritis                  | Grossly evident left femoral head cartilage erosion and acetabulum deformation with associated thickened joint capsule, osteophytes, and synovial hyperplasia (Supplementary Fig. 23).                                                                                                                                                                                                                                                                                                                                                                                                                                                                                                                                                                                                       | 1 † |
|                                                 | Generalized muscle atrophy             | Grossly evident skeletal muscles were shrunken and pale with prominent bony protuberances, likely related to concurrent malocclusion, and pulmonary neoplasia.                                                                                                                                                                                                                                                                                                                                                                                                                                                                                                                                                                                                                               | 1 † |
|                                                 | Limb ascending infection               | A chronic footpad wound of the right hind limb was associated with an ascending infection characterized by suppurative cellulitis, subcutaneous abscesses, and edema. Bacterial culture results: <i>Staphylococcus aureus</i> , <i>Staphylococcus</i> sp., and <i>Enterobacter</i> sp.                                                                                                                                                                                                                                                                                                                                                                                                                                                                                                       | 1 † |
| Nervous                                         | Cerebral gliosis                       | Multifocal gliosis in the cerebral gray matter with no associated meningitis.                                                                                                                                                                                                                                                                                                                                                                                                                                                                                                                                                                                                                                                                                                                | 1   |
| Respiratory‡                                    | Laryngeal hyperkeratosis               | Severe hyperkeratosis, with bacterial colonies and mucosal hyperplasia of the squamous epithelium in the larynx.                                                                                                                                                                                                                                                                                                                                                                                                                                                                                                                                                                                                                                                                             | 1   |

Pathology of wild Norway rats

|                     |                                 |                                                                                                                                                                                                                                                                                                                                                                                                                                                                                                                                                                                                        |    |
|---------------------|---------------------------------|--------------------------------------------------------------------------------------------------------------------------------------------------------------------------------------------------------------------------------------------------------------------------------------------------------------------------------------------------------------------------------------------------------------------------------------------------------------------------------------------------------------------------------------------------------------------------------------------------------|----|
| Female reproductive | Endometritis                    | Variable amounts of erythrocytes, sloughed endometrial cells, and/or granulocytes within the uterine lumen; granulocytic with or without lymphoplasmacytic inflammation in the endometrium, mesometrium, and/or broad ligament; and lymphoplasmacytic cuffing of blood vessels in the broad ligament.                                                                                                                                                                                                                                                                                                  | 4  |
|                     | Endometritis with abscesses     | Abscesses in the uterine horns (Supplementary Fig. 11). Lumen of affected areas contained sloughed endometrial cells, viable and degenerate granulocytes, keratinized squamous cells, necrotic cell debris, and colonies of coccobacilli. The endometrium was multifocally sloughed. Urine glands were ectatic and contained granulocytes. Granulocytes infiltrated the edematous endometrium and myometrium. Hemosiderophages were within the deep myometrium. Bacterial culture results: <i>Enterococcus faecalis</i> , <i>Escherichia coli</i> , <i>Proteus</i> sp., and <i>Bacteroides</i> sp.     | 1† |
|                     | Endometritis—necrotizing        | Right uterine horn was focally congested and dilated by a firm coagulum that consisted of necrotic and mineralized tissues with no identifiable fetal structures microscopically (possibly necrotic placenta or mineralized necrotic cellular debris). The adjacent lumen contained granulocytes and proteinaceous fluid. The myometrium was diffusely edematous and contained a mixed population of inflammatory cells, mainly granulocytes and macrophages. Concurrently, one kidney had pyelonephritis. Bacterial culture results: <i>Salmonella</i> Enteritidis serogroup D and <i>Proteus</i> sp. | 1† |
|                     | Hematometra and endometritis    | Externally, there was a mucohemorrhagic vaginal discharge. Uterine horns were bilaterally dilated and contained hemorrhagic fluid. Histologically, the endometrium was infiltrated by moderate numbers of granulocytes.                                                                                                                                                                                                                                                                                                                                                                                | 1† |
|                     | Purulent clitoral adenitis      | Grossly evident purulent exudate from the clitoral glands was associated histologically with multifocal granulocytic inflammation and necrosis of the clitoral gland. Bacterial culture not performed.                                                                                                                                                                                                                                                                                                                                                                                                 | 2† |
| Male reproductive   | Orchitis                        | Lymphoplasmacytic cell infiltrate and fibrosis within the testes. In one rat, the right testicle was grossly atrophied; microscopically, a large amount of fat surrounded the few remaining seminiferous tubules, which were frequently mineralized and had no visible spermatogenesis. In another rat, granulocytic orchitis was associated with testicular necrosis, and accessory sex glands were inflamed, including one preputial gland, which was gray-green and contained purulent material. Bacterial culture results: <i>E. faecalis</i> and <i>E. coli</i> .                                 | 3† |
| Urinary             | Chronic progressive nephropathy | Both kidneys had multifocal-to-coalescing, tan areas with microscopic evidence of depressions in the renal capsule and cortical lymphoplasmacytic interstitial nephritis and fibrosis. Tubules were occasionally dilated and contained proteinaceous fluid.                                                                                                                                                                                                                                                                                                                                            | 1† |
|                     | Perirenal abscess               | An abscess in the retroperitoneal space adjacent to kidney. Bacterial culture results: <i>S. aureus</i> and <i>E. coli</i>                                                                                                                                                                                                                                                                                                                                                                                                                                                                             | 2† |

|                |                                                                                                                                                                                                                                                                                                                                                                                                                                                     |    |
|----------------|-----------------------------------------------------------------------------------------------------------------------------------------------------------------------------------------------------------------------------------------------------------------------------------------------------------------------------------------------------------------------------------------------------------------------------------------------------|----|
| Pyelonephritis | Kidney(s) were severely shrunken with an irregular surface (Supplementary Fig. 13). Histologically, tubules contained intraluminal granulocytes, protein, and necrotic debris that radiated from the renal pelvis to the cortex. In some areas, lymphoplasmacytic inflammation and severe fibrosis surrounded atrophic tubules, glomeruli, or obliterated normal renal architecture. Pyelonephritis was associated with severe metritis in one rat. | 2† |
| Renal cyst     | A single cystic structure lined by squamous epithelium within the renal cortex.                                                                                                                                                                                                                                                                                                                                                                     | 1  |

\* We examined up to 406 individuals for microscopic lesions. The exact number of tissues examined for these lesions was not systematically recorded given the rarity of these lesions. We assessed grossly evident lesions (indicated by an † following the number affected) in 672 individuals.

‡ Rare microscopic lesions of the respiratory tract are described by Rothenburger et al. 2015.<sup>84</sup>

**Supplementary Table 4.** Parasites and associated lesions identified using histology in a sample of wild urban Norway rats trapped in Vancouver, British Columbia, Canada.

| Location                      | Organism                        | Associated lesion                                                                                                         | n/N*    | Prevalence | 95% CI    | Ref. |
|-------------------------------|---------------------------------|---------------------------------------------------------------------------------------------------------------------------|---------|------------|-----------|------|
| Upper gastrointestinal tract‡ | <i>Eucoleus</i> spp.            | Hyperkeratosis, mucosal hyperplasia, keratin pustules, and submucosal inflammation in the non-glandular stomach (Fig. 4). | 164/399 | 41         | 36.2–46.1 | 85   |
| Non-glandular stomach         | <i>Gongylonema neoplasticum</i> | None.                                                                                                                     | Rare    | NA‡        | NA        | NA   |
| Small intestine               | Nematode                        | None.                                                                                                                     | 83/198  | 42         | 35.0–49.1 | NA   |
|                               | Cestode                         | None.                                                                                                                     | 6/198   | 3.0        | 1.1–6.5   | NA   |
|                               | Coccidia                        | None.                                                                                                                     | 13/198  | 6.6        | 3.5–11.0  |      |



|                                       |                                   |                                                                                                                                                                                                                                                                                                |         |     |           |    |
|---------------------------------------|-----------------------------------|------------------------------------------------------------------------------------------------------------------------------------------------------------------------------------------------------------------------------------------------------------------------------------------------|---------|-----|-----------|----|
| Liver                                 | <i>Capillaria hepatica</i>        | Multifocal, white, tortuous tracts on the liver surface and subcapsular parenchyma with microscopic viable and necrotic capillarid nematodes and/or eggs surrounded by granulocytes or mononuclear cell inflammatory infiltrates and fibrosis, sometimes with mineralization (Figs. 6, 7).     | 242/672 | 36  | 32.4–39.8 | 83 |
| Ears, nose, distal limbs, tail        | <i>Notoedres muris</i>            | Proliferative and crusting dermatitis of the ears (primarily); poorly haired skin of the nose, distal limbs, and tail, characterized by hyperkeratosis with intracorneal pustules and adult mites and/or eggs, epidermal hyperplasia, and lymphoplasmacytic dermatitis (Supplementary Fig. 6). | 2/672   | 0.3 | 0.0–1.1   | 1  |
| Skin                                  | <i>Nosopsyllus fasciatus</i>      | Possible alopecia and exudative dermatitis.                                                                                                                                                                                                                                                    | NA§     | NA  | NA        | NA |
|                                       | <i>Ornithonyssus bacoti</i>       | Possible alopecia and exudative dermatitis.                                                                                                                                                                                                                                                    | NA§     | NA  | NA        | NA |
|                                       | <i>Polyplax spinulosa</i>         | Possible alopecia and exudative dermatitis.                                                                                                                                                                                                                                                    | NA§     | NA  | NA        | NA |
| Urinary bladder (rarely renal pelvis) | <i>Trichosomoides crassicauda</i> | At least one nematode or egg cross-section in urinary bladder or renal pelvis, variably accompanied by mild submucosal lymphoplasmacytic inflammation (Fig. 19).                                                                                                                               | 59/194  | 30  | 24.0–37.4 | NA |

CI = confidence interval; NA = not applicable; Ref. = reference to previous studies of a subsample of rats in the current study. We found no evidence of *Angiostrongylus cantonensis*, *Echinococcus multilocularis*, *Sarcocystis* spp., *Toxoplasma gondii*, or *Trichinella spiralis* infection in any of the rats.

\* Rats were positive if there was at least one characteristic egg and/or adult cross-section in the sections examined. The number of rats examined for each lesion varies because not all tissues were available for each individual rat because of sampling error, tissue artifacts, and/or autolysis.

† Adults and/or eggs were present in tongue, oropharynx, esophagus, and/or non-glandular stomach.

‡ Exact numbers were not assessed given the rarity of infection.

§ Prevalence data are not available for these ectoparasites because they are being assessed by another collaborator on this research project who will present these data in a separate future study.

**Supplementary Table 5.** Bacteria isolated from macroscopic lesions in a sample of wild urban Norway rats trapped in Vancouver, British Columbia, Canada.

| Bacterial species*               | Associated lesion(s)†                                                                                                                                                                                                                                                    | No. of Isolates |
|----------------------------------|--------------------------------------------------------------------------------------------------------------------------------------------------------------------------------------------------------------------------------------------------------------------------|-----------------|
| <i>Bacteroides</i> sp.           | Uterine abscess                                                                                                                                                                                                                                                          | 1               |
| <i>Bordetella bronchiseptica</i> | Pneumonia, pulmonary round cell neoplasia                                                                                                                                                                                                                                | 2               |
| <i>Clostridium sordellii</i>     | Subcutaneous abscess                                                                                                                                                                                                                                                     | 1               |
| <i>Corynebacterium kutscheri</i> | Subcutaneous abscess                                                                                                                                                                                                                                                     | 1               |
| <i>Enterobacter</i> sp.          | Ascending hind limb infection                                                                                                                                                                                                                                            | 1               |
| <i>Enterococcus cloacae</i>      | Cervical lymph node abscess                                                                                                                                                                                                                                              | 1               |
| <i>Enterococcus faecalis</i>     | Cervical lymph node abscess, mesenteric lymph node abscess, preputial gland abscess, purulent penile discharge, subcutaneous abscess, urinary bladder concretion, uterine abscess, and vaginal discharge                                                                 | 12              |
| <i>Escherichia coli</i>          | Ascending hindlimb infection, cervical lymph node abscess, perirenal abscess, lung abscess, mesenteric lymph node abscess, preputial discharge, pneumonia, subcutaneous abscess, pulmonary round cell neoplasia, seminal vesicle, uterine abscess, and vaginal discharge | 15              |
| <i>Gemella morbillorum</i>       | Pulmonary round cell neoplasia                                                                                                                                                                                                                                           | 1               |
| <i>Klebsiella pneumoniae</i>     | Cervical lymph node abscess                                                                                                                                                                                                                                              | 1               |
| <i>Lactobacillus animalis</i>    | Vaginal discharge                                                                                                                                                                                                                                                        | 1               |
| <i>Pasteurellaceae</i> ‡         | Subcutaneous abscess                                                                                                                                                                                                                                                     | 1               |

Pathology of wild Norway rats

|                                     |                                                                                                                                                                                                                                                                                  |    |
|-------------------------------------|----------------------------------------------------------------------------------------------------------------------------------------------------------------------------------------------------------------------------------------------------------------------------------|----|
| <i>Pasteurella dagmatis</i>         | Panophthalmitis                                                                                                                                                                                                                                                                  | 1  |
| <i>Pasteurella pneumotropica</i>    | Submandibular abscess                                                                                                                                                                                                                                                            | 1  |
| <i>Proteus</i> sp.                  | Preputial discharge, seminal vesicle, suppurative metritis, uterine abscess, and vaginal discharge                                                                                                                                                                               | 5  |
| <i>Salmonella</i> Enteritidis       | Suppurative metritis                                                                                                                                                                                                                                                             | 1  |
| <i>Staphylococcus aureus</i>        | Ascending hindlimb infection, perirenal abscess, mediastinal abscess with metal projectile pellet, purulent penile discharge, pulmonary round cell neoplasia, retropharyngeal abscess, skeletal muscle abscess, subcutaneous abscess, subscapular abscess, and vaginal discharge | 13 |
| <i>Staphylococcus</i> sp.           | Ascending hindlimb infection, preputial gland abscess, mesenteric lymph node abscess, skeletal muscle and subcutaneous abscess                                                                                                                                                   | 6  |
| <i>Streptococcus</i> sp.            | Vaginal discharge                                                                                                                                                                                                                                                                | 1  |
| <i>Streptococcus gallinaceus</i>    | Panophthalmitis                                                                                                                                                                                                                                                                  | 1  |
| <i>Streptobacillus moniliformis</i> | Cervical lymph node abscess and subcutaneous abscess                                                                                                                                                                                                                             | 3  |

\* Bacteria isolated from bite wounds and associated soft tissue infections is described elsewhere<sup>50</sup>; ancillary testing that identified *Mycoplasma pulmonis* and cilia-associated respiratory bacillus in the lungs of a subsample of rats in the current study is described elsewhere<sup>84</sup>; this table does not include these results.

† Many infections were polymicrobial; therefore, lesions may be listed for multiple bacterial species.

‡ Isolates from a potentially novel genus that grouped most closely with *Haemophilus* sp., *Actinobacillus* sp., *Pasteurella* sp., and *Aggregatibacter* sp. using 16S DNA sequencing.<sup>50</sup>

**Supplementary Table 6.** Patterns of infections by 3 parasitic nematodes among 192 Norway rats trapped in Vancouver, British Columbia, Canada.

| Patterns of pathogen detection |                     |                                   | Observed no. of rats with each pattern | Observed prevalence of each pattern (%) |
|--------------------------------|---------------------|-----------------------------------|----------------------------------------|-----------------------------------------|
| <i>Capillaria hepatica</i>     | <i>Eucoleus</i> sp. | <i>Trichosomoides crassicauda</i> |                                        |                                         |
| –                              | –                   | –                                 | 57                                     | 30                                      |
| –                              | +                   | –                                 | 26                                     | 14                                      |
| +                              | +                   | –                                 | 26                                     | 14                                      |
| +                              | +                   | +                                 | 25                                     | 13                                      |
| +                              | –                   | –                                 | 24                                     | 13                                      |
| +                              | –                   | +                                 | 16                                     | 8                                       |
| –                              | +                   | +                                 | 11                                     | 6                                       |
| –                              | –                   | +                                 | 7                                      | 6                                       |

– = absence of pathogen; + = presence of pathogen.

**Supplementary Table 7.** Demographic characteristics and associations with thyroid follicular hyperplasia in a group of Norway rats trapped in Vancouver, British Columbia, Canada.

| Category/Subcategory | Thyroid follicular hyperplasia |                           | Univariable |           |                | Multivariable |           |                |
|----------------------|--------------------------------|---------------------------|-------------|-----------|----------------|---------------|-----------|----------------|
|                      | Present* ( <i>n</i> =142)      | Absent* ( <i>n</i> = 137) | Odds ratio  | 95% CI    | <i>p</i> value | Odds ratio    | 95% CI    | <i>p</i> value |
| Season               |                                |                           |             |           |                |               |           |                |
| Fall                 | 58 (41)                        | 47 (34)                   | ref         | —         | —              | —             | —         | —              |
| Winter               | 42 (30)                        | 17 (12)                   | 2.00        | 0.99–4.30 | 0.046†         | —             | —         | —              |
| Spring               | 29 (20)                        | 53 (39)                   | 0.44        | 0.24–0.90 | 0.007          | —             | —         | —              |
| Summer               | 13 (9.2)                       | 20 (15)                   | 0.53        | 0.22–1.24 | 0.115          | —             | —         | —              |
| Sex                  |                                |                           |             |           |                |               |           |                |
| Female               | 46 (32)                        | 71 (52)                   | ref         | —         | —              | ref           | —         | —              |
| Male                 | 96 (68)                        | 66 (48)                   | 2.52        | 1.51–4.31 | <0.001         | 1.97          | 1.14–3.45 | 0.016          |
| Sexual maturity      |                                |                           |             |           |                |               |           |                |
| Immature             | 16 (11)                        | 34 (25)                   | ref         | —         | —              | —             | —         | —              |
| Mature               | 115 (81)                       | 86 (63)                   | 2.81        | 1.40–5.85 | 0.004          | —             | —         | —              |
| Body mass (g)‡       |                                |                           |             |           |                |               |           |                |
| <65                  | 10 (7.0)                       | 14 (10)                   | ref         | —         | —              | ref           | —         | —              |
| 65–144               | 27 (19)                        | 49 (36)                   | 0.82        | 0.29–2.32 | 0.705§         | 0.80          | 0.28–2.30 | 0.676          |
| 145–256              | 48 (35)                        | 37 (26)                   | 1.07        | 0.39–3.01 | 0.899          | 1.14          | 0.41–3.27 | 0.801          |
| >256                 | 68 (47)                        | 26 (19)                   | 4.25        | 1.52–12.6 | 0.007          | 3.69          | 1.30–11.1 | 0.016          |
| Body condition score |                                |                           |             |           |                |               |           |                |
| Poor (0)             | 31 (22)                        | 45 (33)                   | ref         | —         | —              | —             | —         | —              |
| Moderate (1)         | 55 (39)                        | 47 (34)                   | 1.61        | 0.85–3.11 | 0.146          | —             | —         | —              |
| Good (2)             | 54 (38)                        | 44 (32)                   | 1.67        | 0.86–3.28 | 0.132          | —             | —         | —              |

CI = confidence interval; dash (—) = no values necessary; ref = referent category.

\* Frequencies and percentages (in parentheses) may not total 100% because of exclusion of rats with missing data for the variable in question.

† Overall  $p$  value for categorical variable:  $p = 0.008$ .

‡ Categorized by quartiles.

§ Overall  $p$  value for categorical variable:  $p < 0.001$ .

| Overall  $p$  value for categorical variable was not significant ( $p > 0.05$ ).

**Supplementary Table 8.** Demographic characteristics and associations with lymphoplasmacytic interstitial nephritis in a group of Norway rats trapped in Vancouver, British Columbia, Canada.

| Category/Subcategory | Interstitial nephritis |                       | Univariable |           |           | Multivariable |        |           |
|----------------------|------------------------|-----------------------|-------------|-----------|-----------|---------------|--------|-----------|
|                      | Present* ( $n = 121$ ) | Absent* ( $n = 284$ ) | Odds ratio  | 95% CI    | $p$ value | Odds ratio    | 95% CI | $p$ value |
| Season               |                        |                       |             |           |           |               |        |           |
| Fall                 | 42 (35)                | 120 (42)              | ref         | —         | —         | —             | —      | —         |
| Winter               | 43 (17)                | 45 (16)               | 2.46        | 1.03–5.71 | 0.026†    | —             | —      | —         |
| Spring               | 25 (21)                | 86 (30)               | 0.83        | 0.35–1.90 | 0.642     | —             | —      | —         |
| Summer               | 11 (9.1)               | 33 (12)               | 1.08        | 0.36–3.62 | 0.892     | —             | —      | —         |
| Sex                  |                        |                       |             |           |           |               |        |           |
| Female               | 40 (33)                | 128 (45)              | ref         | —         | —         | —             | —      | —         |
| Male                 | 81 (67)                | 156 (55)              | 1.65        | 1.04–2.67 | 0.035     | —             | —      | —         |
| Sexual maturity‡     |                        |                       |             |           |           |               |        |           |

Pathology of wild Norway rats

|                                 |          |          |      |            |        |      |            |        |
|---------------------------------|----------|----------|------|------------|--------|------|------------|--------|
| Immature                        | 1 (0.8)  | 77 (27)  | —    | —          | —      | —    | —          | —      |
| Mature                          | 117 (97) | 177 (62) | —    | —          | —      | —    | —          | —      |
| Body mass (g)§                  |          |          |      |            |        |      |            |        |
| <65                             | 1 (0.8)  | 40 (14)  | ref  | —          | —      | ref  | —          | —      |
| 65–144                          | 6 (5.0)  | 106 (37) | 2.25 | 0.36–43.8  | 0.463  | 2.25 | 0.36–43.8  | 0.463  |
| 145–256                         | 35 (29)  | 89 (31)  | 21.0 | 4.0–390    | 0.004  | 21.0 | 4.02–390   | 0.004  |
| >256                            | 79 (65)  | 49 (17)  | 84.7 | 16.2–1,580 | <0.001 | 84.7 | 16.2–1,580 | <0.001 |
| Body condition score            |          |          |      |            |        |      |            |        |
| Poor (0)                        | 8 (6.6)  | 113 (40) | ref  | —          | —      | —    | —          | —      |
| Moderate (1)                    | 34 (28)  | 103 (36) | 4.71 | 2.14–11.6  | <0.001 | —    | —          | —      |
| Good (2)                        | 77 (64)  | 66 (23)  | 16.3 | 7.58–39.6  | <0.001 | —    | —          | —      |
| <i>Leptospira interrogans</i> † |          |          |      |            |        |      |            |        |
| Negative                        | 78 (65)  | 244 (86) | ref  |            |        | —    | —          | —      |
| Positive                        | 28 (23)  | 26 (9.2) | 4.22 | 2.02–9.30  | <0.001 | —    | —          | —      |

CI = confidence interval; dash (—) = no values necessary; ref = referent category.

\* Frequencies and percentages (in parentheses) may not total 100% because of exclusion of rats with missing data for the variable in question.

† Overall  $p$  value for categorical variable:  $p = 0.10$ .

‡ Logistic regression was not carried out because of a lack of variability in the data.

§ Categorized by quartiles.

‡ Tested with PCR; data were previously described by Himsworth et al. 2013.<sup>46</sup>

**Supplementary Table 9.** Demographic characteristics and associations with lymphoplasmacytic pyelitis in a group of Norway rats trapped in Vancouver, British Columbia, Canada.

| Category/Subcategory              | Pyelitis          |                   | Univariable |            |         | Multivariable |           |         |
|-----------------------------------|-------------------|-------------------|-------------|------------|---------|---------------|-----------|---------|
|                                   | Present* (n = 85) | Absent* (n = 170) | Odds ratio  | 95% CI     | p value | Odds ratio    | 95% CI    | p value |
| Season                            |                   |                   |             |            |         |               |           |         |
| Fall                              | 44 (52)           | 64 (38)           | ref         | —          | —       | —             | —         | —       |
| Winter                            | 21 (25)           | 32 (19)           | 0.75        | 0.23–1.92  | 0.564   | —             | —         | —       |
| Spring                            | 13 (15)           | 51 (30)           | 0.40        | 0.15–1.12  | 0.058   | —             | —         | —       |
| Summer                            | 7 (8.2)           | 23 (14)           | 0.45        | 0.11–1.62  | 0.197   | —             | —         | —       |
| Sex                               |                   |                   |             |            |         |               |           |         |
| Female                            | 39 (46)           | 68 (40)           | ref         | —          | —       | —             | —         | —       |
| Male                              | 46 (54)           | 102 (60)          | 0.72        | 0.41–1.28  | 0.269   | —             | —         | —       |
| Sexual maturity†                  |                   |                   |             |            |         |               |           |         |
| Immature                          | 0 (0.0)           | 50 (29)           | —           | —          | —       | —             | —         | —       |
| Mature                            | 83 (98)           | 100 (59)          | —           | —          | —       | —             | —         | —       |
| Body mass (g)‡                    |                   |                   |             |            |         |               |           |         |
| <144                              | 4 (4.7)           | 96 (57)           | ref         | —          | —       | ref           | —         | —       |
| ≥145                              | 81 (95)           | 74 (44)           | 26.27       | 10.3–89.7  | <0.001  | 9.69          | 3.20–37.7 | <0.001  |
| Body condition score              |                   |                   |             |            |         |               |           |         |
| Poor (0)                          | 4 (4.7)           | 71 (42)           | ref         | —          | —       | —             | —         | —       |
| Moderate (1)                      | 30 (35)           | 57 (34)           | 9.34        | 3.38–32.8  | <0.001  | 4.92          | 1.40–23.1 | 0.021   |
| Good (2)                          | 50 (59)           | 39 (23)           | 22.76       | 8.20–79.5  | <0.001  | 5.24          | 1.41–25.4 | 0.020   |
| <i>Leptospira interrogans</i> §   |                   |                   |             |            |         |               |           |         |
| Negative                          | 47 (55)           | 147 (87)          | ref         | —          | —       | ref           | —         | —       |
| Positive                          | 28 (33)           | 10 (5.9)          | 8.69        | 3.79–20.36 | <0.001  | 3.29          | 1.42–8.62 | 0.010   |
| <i>Trichosomoides crassicauda</i> |                   |                   |             |            |         |               |           |         |



|          |         |         |      |           |       |   |   |   |
|----------|---------|---------|------|-----------|-------|---|---|---|
| Negative | 22 (26) | 58 (34) | ref  | —         | —     | — | — | — |
| Positive | 24 (28) | 17 (10) | 3.72 | 1.70–8.55 | 0.001 | — | — | — |

CI = confidence interval; dash (—) = no values necessary; ref = referent category.

\* Frequencies and percentages (in parentheses) may not add to 100% because of exclusion of rats with missing data for the variable in question.

† Logistic regression was not carried out because of a lack of variability in the data.

‡ Dichotomized by median weight.

§ Tested with PCR; data were previously described by Himsworth et al. 2013.<sup>46</sup>

**Supplementary Table 10.** Demographic characteristics and associations with *Trichosomoides crassicauda* infection in a group of Norway rats trapped in Vancouver, British Columbia, Canada.

| Category/Subcategory | <i>Trichosomoides crassicauda</i> |                   | Univariable |           |         | Multivariable |        |         |
|----------------------|-----------------------------------|-------------------|-------------|-----------|---------|---------------|--------|---------|
|                      | Present* (n = 59)                 | Absent* (n = 135) | Odds ratio  | 95% CI    | p value | Odds ratio    | 95% CI | p value |
| Season               |                                   |                   |             |           |         |               |        |         |
| Fall                 | 36 (61)                           | 41 (30)           | ref         | —         | —       | —             | —      | —       |
| Winter               | 11 (19)                           | 31 (23)           | 0.40        | 0.17–0.96 | 0.030   | —             | —      | —       |
| Spring               | 7 (12)                            | 46 (34)           | 0.17        | 0.06–0.42 | <0.001  | —             | —      | —       |
| Summer               | 5 (8.5)                           | 17 (13)           | 0.33        | 0.10–1.04 | 0.050   | —             | —      | —       |
| Sex                  |                                   |                   |             |           |         |               |        |         |

Pathology of wild Norway rats

|                      |          |         |      |           |        |      |           |        |
|----------------------|----------|---------|------|-----------|--------|------|-----------|--------|
| Male                 | 31 (53)  | 90 (67) | ref  | —         | —      | ref  | —         | —      |
| Female               | 28 (48)  | 45 (33) | 1.90 | 0.97–3.76 | 0.055  | 2.11 | 1.04–4.39 | 0.040  |
| Sexual maturity†     |          |         |      |           |        |      |           |        |
| Immature             | 0 (0)    | 29 (22) | —    | —         | —      | —    | —         | —      |
| Mature               | 59 (100) | 94 (70) | —    | —         | —      | —    | —         | —      |
| Body mass (g)‡       |          |         |      |           |        |      |           |        |
| <144                 | 2 (3.4)  | 62 (46) | ref  | —         | —      | ref  | —         | —      |
| ≥145                 | 57 (97)  | 73 (54) | 23.2 | 6.68–146  | <0.001 | 24.4 | 6.96–154  | <0.001 |
| Body condition score |          |         |      |           |        |      |           |        |
| Poor (0)             | 8 (47)   | 46 (34) | ref  | —         | —      | —    | —         | —      |
| Moderate (1)         | 21 (36)  | 46 (34) | 2.38 | 0.93–6.43 | 0.074  | —    | —         | —      |
| Good (2)             | 29 (26)  | 42 (31) | 3.39 | 1.35–9.11 | 0.011  | —    | —         | —      |

CI = confidence interval; dash (—) = no values necessary; ref = referent category.

\* Frequencies and percentages (in parentheses) may not add to 100% because of exclusion of rats with missing data for the variable in question.

† Logistic regression was not carried out because of a lack of variability in the data.

‡ Dichotomized by median weight.

§ Tested with PCR; data were previously described by Himsworth et al. 2013.<sup>46</sup>

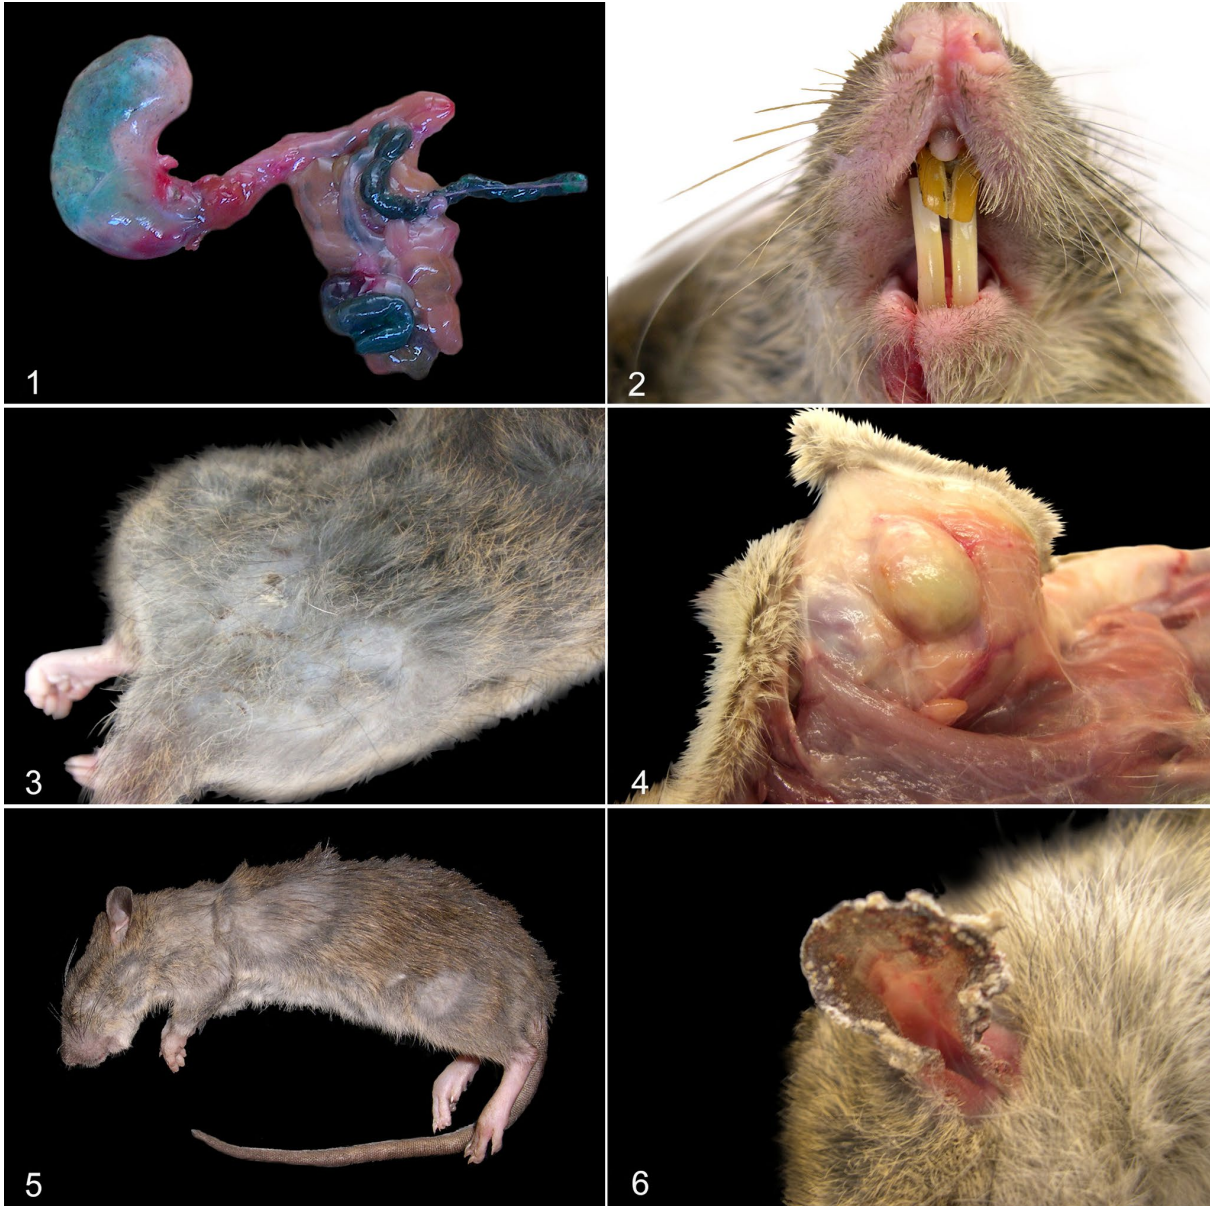

**Supplementary Figure 1.** Turquoise material present in the stomach and segments of the small intestine is consistent with anticoagulant rodenticide bait. **Supplementary Figure 2.** The lower incisors are severely overgrown, and the occlusive surface of upper incisors is slanted (malocclusion). **Supplementary Figure 3.** The skin over the dorsum is alopecic, and there are multiple, small bite wounds. **Supplementary Figure 4.** Abscess in the subcutaneous tissue overlying the lateral thorax. Abscesses were often associated with cutaneous bite wounds. **Supplementary Figure 5.** There are multifocal areas of alopecia over the trunk. **Supplementary Figure 6.** The nodular areas of proliferative dermatitis affecting the pinna are indicative of *Notoedres muris* infection.



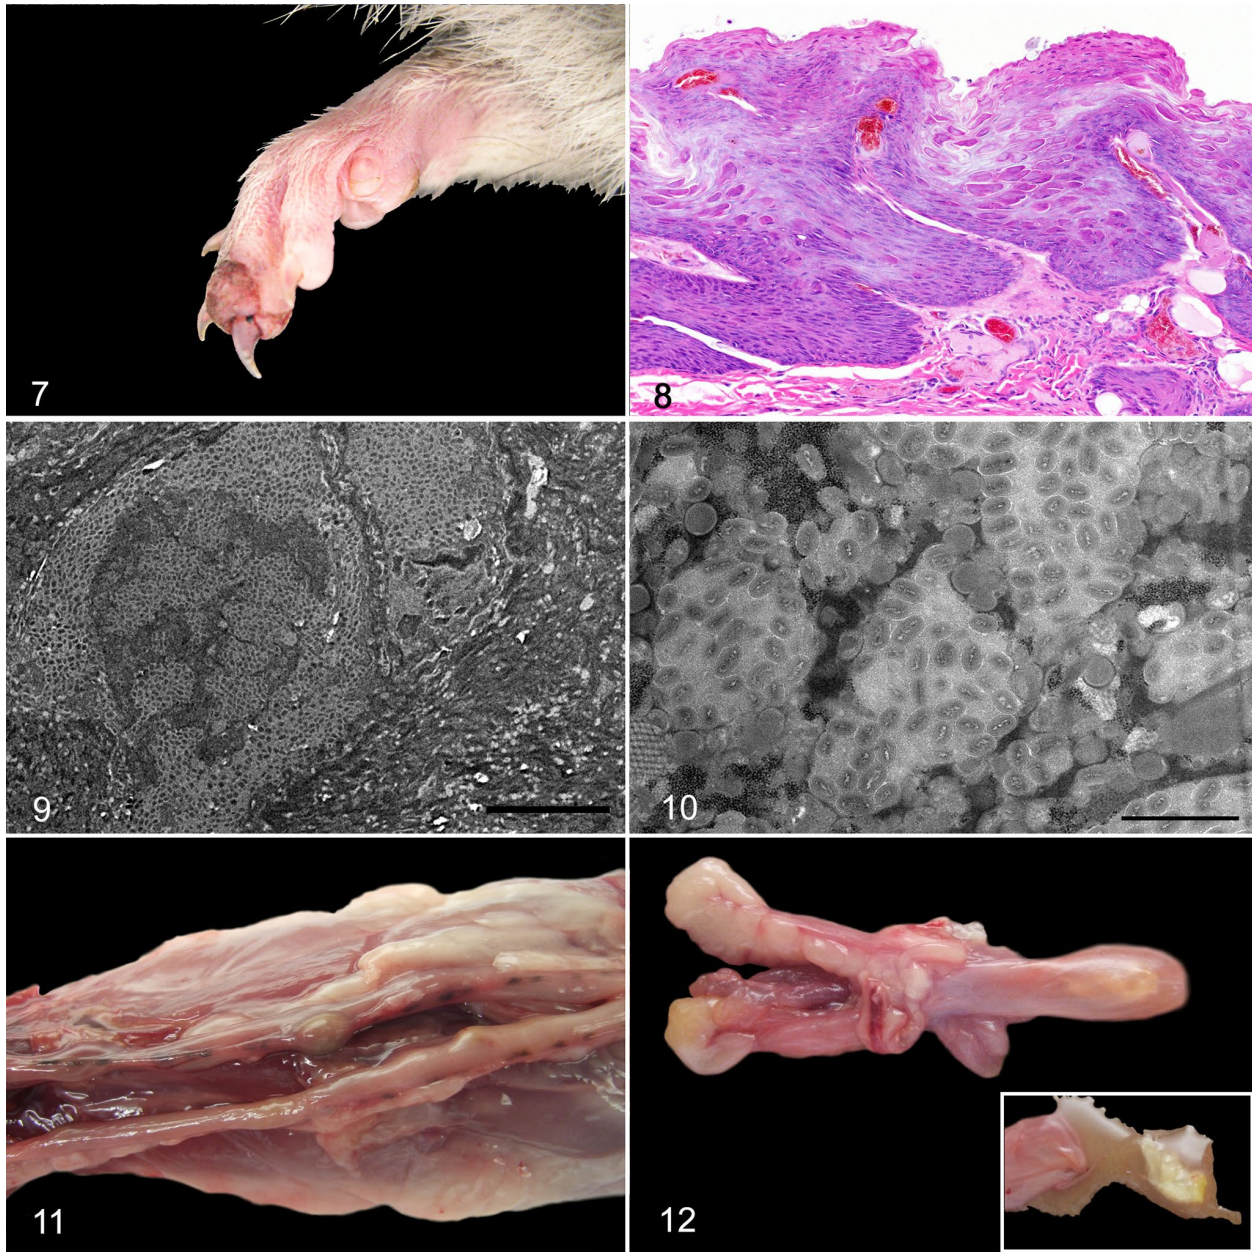

**Supplementary Figures 7–12.** Poxviral focal proliferative dermatitis affecting the skin of a digit in a Norway rat (*Rattus norvegicus*). **Supplementary Figure 7.** A focal, ulcerated, and proliferative mass spans the nail bed to the distal interphalangeal joint. **Supplementary Figure 8.** Epithelial proliferation is characterized by severe acanthosis, dyskeratotic hyperkeratosis, and scalloping of the epidermal-dermal junction. Keratinocytes in the stratum spinosum contain large, amorphous amphophilic intracytoplasmic inclusions. H&E. **Supplementary Figure 9.** There are abundant pox-like virions within the intracytoplasmic inclusions. Transmission electron micrograph. Bar = 5  $\mu\text{m}$ . **Supplementary Figure 10.** Ovoid to brick-shaped, enveloped pox-like

virions are  $\sim 200 \times 300$  nm. Transmission electron micrograph. Bar = 1  $\mu$ m. **Supplementary Figure 11.** Focal abscess is present in the middle of the left horn. There are multiple, black placental scars (normal in parous rats). **Supplementary Figure 12.** Concretions of seminal fluid are within the urinary bladder. Firm, yellow concretions of seminal discharge are an agonal change in male rats. Inset shows the expelled concretion and urine.

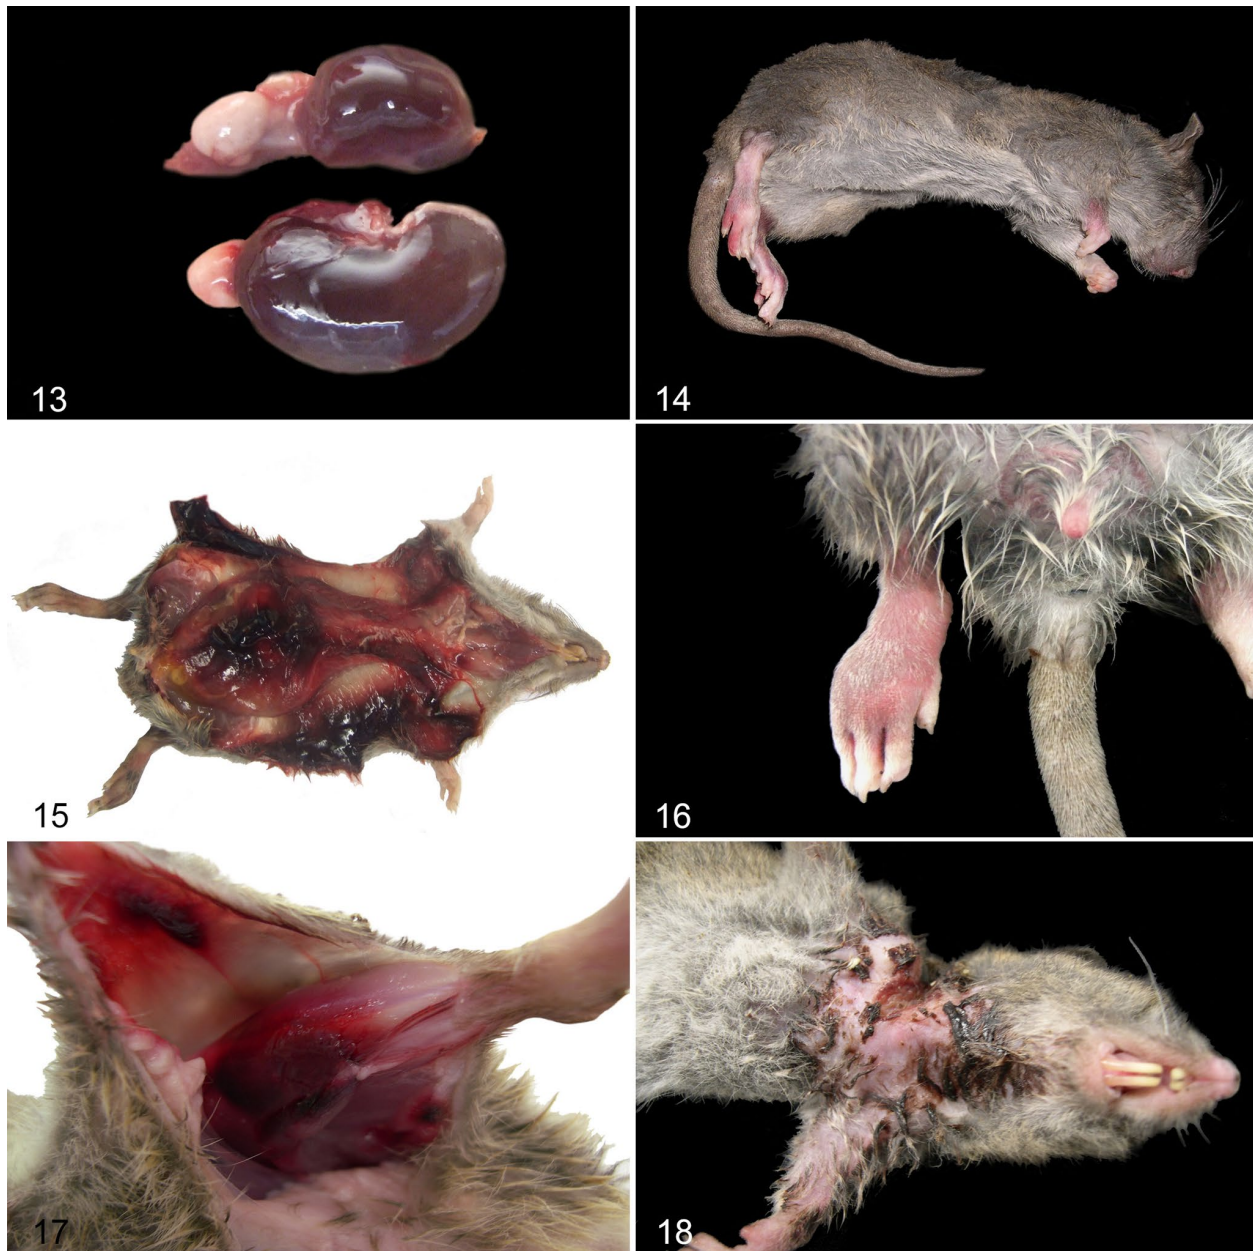

**Supplementary Figure 13.** The kidney affected by pyelonephritis is shrunken with an irregular capsular surface. **Supplementary Figure 14.** Periarticular and subcutaneous hemorrhages



indicative of anticoagulant rodenticide exposure is affecting multiple distal limbs.

**Supplementary Figure 15.** The subcutaneous tissues have severe, locally extensive hemorrhages. **Supplementary Figure 16.** The right lower limb has severe subcutaneous hematoma indicative of anticoagulant rodenticide exposure. **Supplementary Figure 17.** The left hind limb has severe subcutaneous and periarticular hemorrhages indicative of anticoagulant rodenticide exposure. **Supplementary Figure 18.** A chronic, linear wound with associated crusting and alopecia surrounds the neck and cranial thorax. This lesion may have resulted from non-lethal trauma from a snap-type trap.

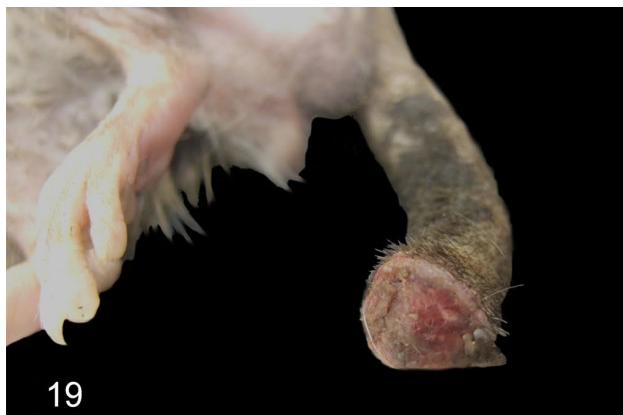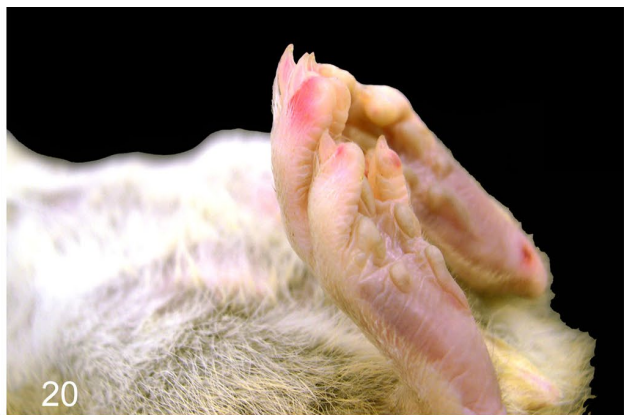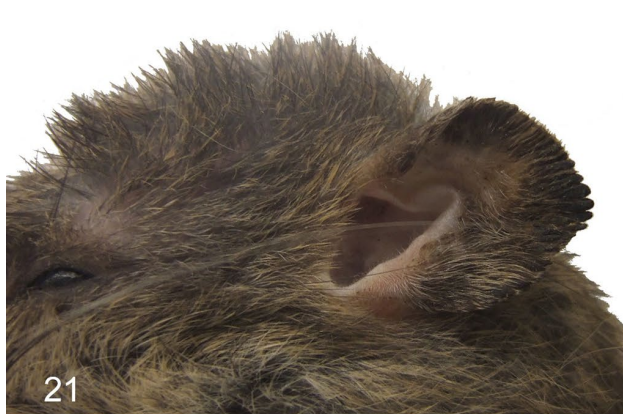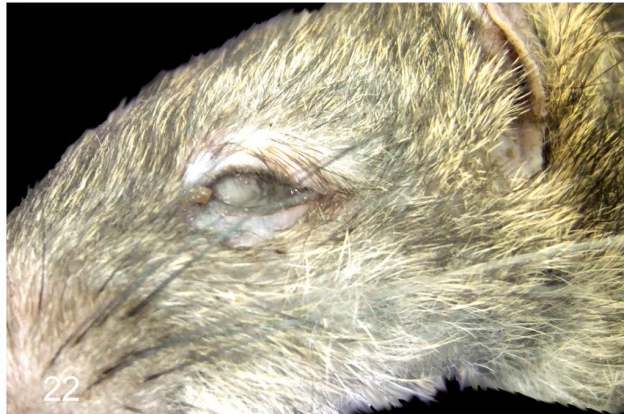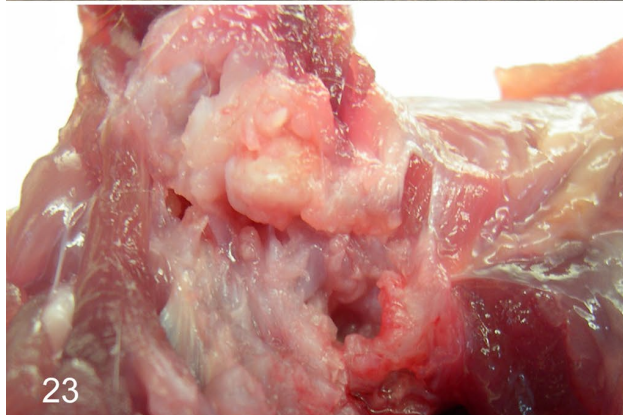

**Supplementary Figure 19.** The tail was amputated leaving an open wound overlying the stump. **Supplementary Figure 20.** The toes are affected by multifocal areas of hyperemia. These lesions may have been caused by acute trauma from cage-type traps. **Supplementary Figure 21.** The skin of the left pinna has severe hyperkeratosis. **Supplementary Figure 22.** The left globe is collapsed, and there is corneal opacity and mucopurulent exudate on the eyelids indicative of panophthalmitis. **Supplementary Figure 23.** The left coxofemoral joint is affected by arthritis that features capsule thickening and roughening of the articular cartilage.

# Wild Rat Autopsy Form

Date: \_\_\_\_\_ Animal number: \_\_\_\_\_

Location: \_\_\_\_\_

Person completing autopsy: \_\_\_\_\_

---

---

## ***External***

Species (based on a mammalian identification key): Norway / Black

Weight (grams): \_\_\_\_\_ Nose-to-rump length (cm): \_\_\_\_\_

Presence of Cutaneous **Bite Wounds**: yes / no # of bite wounds: \_\_\_\_\_

Presence of ***Notoedres muris*** (cutaneous nodules/deformed ears): yes / no

Description:

---

**Body Condition Score** (based on quantity of subcutaneous & visceral fat)

1. Poor                      2. Moderate                      3. Good

## ***Reproductive***

**Female:** yes / no

Open vaginal orifice:                      yes / no

Prominent nipples:                      yes / no

Visible mammary tissue:                      yes / no

Pregnant:                      yes / no                      # of embryos: \_\_\_\_\_

Placental scars:                      yes / no                      # of placental scars: \_\_\_\_\_

**Male:** yes / no

Testicle position:                      scrotal or inguinal/abdominal

Prominent accessory sex glands:                      yes / no

Visible seminiferous tubules:                      yes / no

Reproductive tract notes:

(over)



# Wild Rat Autopsy Form

Stomach contents present:            yes / no

Stomach content description:

***Capillaria hepatica*** in liver (multifocal white spots):    yes / no

Description of distribution:

## Hemorrhage:

subcutaneous            Location:

periarticular            Location:

other                      Location:

Additional Notes including lesions:

pictures taken
